# Supplementary material for: Ubiquinone binding site of yeast NADH dehydrogenase revealed by structures binding novel competitive- and mixed-type inhibitors
Source: PubMed Central journal article supplement (PMC5799168; doi:10.1038/s41598-018-20775-6), 2018-02-05
Supplement: 41598_2018_20775_MOESM1_ESM.pdf [file 41598_2018_20775_MOESM1_ESM.pdf]

## *Supplementary Information*

### **Ubiquinone binding site of yeast NADH dehydrogenase revealed by structures binding novel competitive- and mixed-type inhibitors.**

Tetsuo Yamashita<sup>1,\*†</sup>, Daniel Ken Inaoka<sup>2,3,†</sup>, Tomoo Shiba<sup>4,†</sup>, Takumi Oohashi<sup>2</sup>, So Iwata<sup>5,6,7,8,9</sup>, Takao Yagi<sup>10</sup>, Hiroaki Kosaka<sup>1,‡</sup>, Hideto Miyoshi<sup>11</sup>, Shigeharu Harada<sup>4,\*</sup>, Kiyoshi Kita<sup>2,3</sup>, Katsuya Hirano<sup>1</sup>

<sup>1</sup>Department of Cardiovascular Physiology, Faculty of Medicine, Kagawa University, Kita-gun, Kagawa 761-0793, Japan.

<sup>2</sup>Department of Biomedical Chemistry, Graduate School of Medicine, The University of Tokyo, Tokyo 113-0033, Japan

<sup>3</sup>School of Tropical Medicine and Global Health, Nagasaki University, 1-12-4, Sakamoto, Nagasaki 852-8523, Japan

<sup>4</sup>Department of Applied Biology, Graduate School of Science and Technology, Kyoto Institute of Technology, Kyoto 606-8585, Japan

<sup>5</sup>Division of Molecular Biosciences, Membrane Protein Crystallography Group, Imperial College, London SW7 2AZ, UK.

<sup>6</sup>Membrane Protein Laboratory, Diamond Light Source, Harwell Science and Innovation Campus, Chilton, Didcot, Oxfordshire OX11 0DE, UK.

<sup>7</sup>Japan Science and Technology Agency, Exploratory Research for Advanced Technology, Human Receptor Crystallography Project, Yoshida-Konoe-cho, Sakyo-ku, Kyoto 606-8501, Japan.

<sup>8</sup>Department of Cell Biology, Graduate School of Medicine, Kyoto University, Yoshida-Konoe-cho, Sakyo-Ku, Kyoto 606-8501, Japan.

<sup>9</sup>Systems and Structural Biology Centre, RIKEN, 1-7-22 Suehiro-cho Tsurumi-ku, Yokohama, Kanagawa 230-0045, Japan.

<sup>10</sup>Department of Molecular and Experimental Medicine, The Scripps Research Institute, La Jolla, California 92037, USA.

<sup>11</sup>Division of Applied Life Sciences, Graduate School of Agriculture, Kyoto University, Sakyo-ku, Kyoto 606-8502, Japan.

\*Correspondence: harada@kit.ac.jp (S.H.)

tyama@med.kagawa-u.ac.jp (T. Yamashita)

†These authors contributed equally to this work.

‡Present address: Osaka Jikei College, 1-2-8 Miyahara, Yodogawa-Ku, Osaka 532-0003, Japan.

## Supplementary Methods

**The expression and purification of Ndi1.** The mature Ndi1, which lacks a mitochondrial targeting signal, is expressed as a recombinant protein tagged with (His)<sub>10</sub> by pET16b vector and *E. coli* BL21(DE3)pLysS. The construction of the expression plasmid, pET16b(NDI1-m), was described previously<sup>1</sup>. The bacterial cells harboring pET16b(NDI1-m) were grown in 5 mL of 2 × YT medium containing 100 µg/mL of ampicillin and 20 µg/mL of chloramphenicol for about 7–8 h with rotation at 220 rpm at 37°C and then they were inoculated to 500 mL of MagicMedia™ *E. coli* expression medium (Life Technologies) containing 100 µg/mL of ampicillin for the expression of recombinant proteins. This media does not require isopropyl β-D-thiogalactopyranoside for the induction of the expression. The cells were cultured in highly aerated conditions using a 2.5 L baffled flask (Ultra Yield flask™) with rotation at 300 rpm at 37°C. After 15-16 h, the cells were collected by centrifugation at 8,000 × *g* for 10 min.

The wild-type Ndi1 used in the crystallization trial and the evaluation experiments of inhibitors was purified using a detergent exchange procedure, as described previously<sup>1</sup>. The harvested cells were homogenized in 50 mM Tris-HCl (pH 8.0 at 25°C), 1 mM EDTA, and protease inhibitor cocktail (cOmplete ULTRA Tablets; Roche) by freeze-and-thaw cycles (repeated two times) in liquid nitrogen with sonication for 3 min (Output: 20%, 1/4" microchip, SONIFIER 250D-Advanced; Branson). The homogenates were centrifuged at 10,000 × *g* for 10 min at 4°C to remove unbroken cells and inclusion bodies, and the supernatant was further centrifuged at 183,000 × *g* for 90 min at 4°C. The pellet (membrane fraction) was then suspended at 5 mg of protein/ml in 50 mM Tris-HCl (pH 8.0 at 4°C), 200 mM NaCl, 0.1 mM EDTA, 1 mM phenylmethylsulfonyl fluoride, and 10% glycerol (buffer A). After adding Triton X-100 at a final concentration of 0.3% (*w/v*), the sample was incubated for 30 min at 4°C with slow stirring and centrifuged at 183,000 × *g* for 90 min at 4°C. The supernatant was loaded onto a Ni-sepharose column (HisTrap HP, 5 mL; GE healthcare), which was equilibrated with buffer A containing 0.02% (*w/v*) Triton X-100. The column was washed with 10 column volumes of buffer A containing 0.1% (*w/v*) Triton X-100 and 15 mM histidine. The column was subjected to detergent exchange by washing with 5 column volumes of buffer A, 10 column volumes of buffer A containing 0.1% (*w/v*) dodecyl-β-D-maltoside (DDM), and 5 volumes of buffer A containing 0.02% (*w/v*) DDM. Thereafter, the enzyme was eluted with buffer A containing 0.02% (*w/v*) DDM and 200 mM histidine and 50 mM imidazole. The eluents were immediately loaded onto a desalting column (Econo-Pac 10DG, 10 ml; Bio-Rad), which had been equilibrated with 50 mM Mops-NaOH (pH 7.0) containing 0.1 mM EDTA, 10% (*w/v*) glycerol, and 0.02% (*w/v*) DDM. The desalted specimen was then concentrated with Amicon-Ultra (molecular weight cut-off 30K; Millipore) to 10 mg of protein/ml. The yield of Ndi1 contains >20 mg/L of culture media. The purity of the Ndi1 preparations was approximately 90%, as determined by the intensity of the 57 kDa band on a SDS-PAGE gel stained with CBB Stain One Super (Nacalai, Japan). The purified recombinant Ndi1 was quickly frozen in liquid nitrogen and stored at –80°C until use.

**Site-directed mutagenesis.** The amino acid replacements of Ndi1 were basically performed with PrimeSTAR mutagenesis basal kit (Takara, Japan) using pET16b(NDI1-m) (2) and a synthetic oligonucleotide primer set (Table S2). The mutagenesis of H397 was performed with a QuikChange II XL site-directed mutagenesis kit (Stratagene, CA). Each mutation was confirmed through DNA sequencing (DNA sequencing service, Eurofins). The purification procedure of wild-type and mutant enzymes, used for the determination of the kinetic parameters (Table 2), was basically the same as the above procedure, without the replacement of the detergent from Triton X-100 with DDM. After washing the enzyme with buffer A containing 0.1% Triton X-100 and 15 mM histidine, 0.02% Triton X-100 was added to all buffer as a substitute for DDM. With the exception of 5 mutants containing L444D, I459A, I459N, R479I, and R479H, which showed a yield <10% of wild-type (1.04, 1.86, 1.58, 1.06, and 1.74 mg of protein/L of culture media, respectively), the yields of the mutant enzymes were comparable to the yield of the wild-type enzyme.

## References

- 1 Yamashita, T., Nakamaru-Ogiso, E., Miyoshi, H., Matsuno-Yagi, A. & Yagi, T. Roles of bound quinone in the single subunit NADH-quinone oxidoreductase (Ndi1) from *Saccharomyces cerevisiae*. *J Biol Chem* **282**, 6012-6020, (2007).

## Supplementary Figures

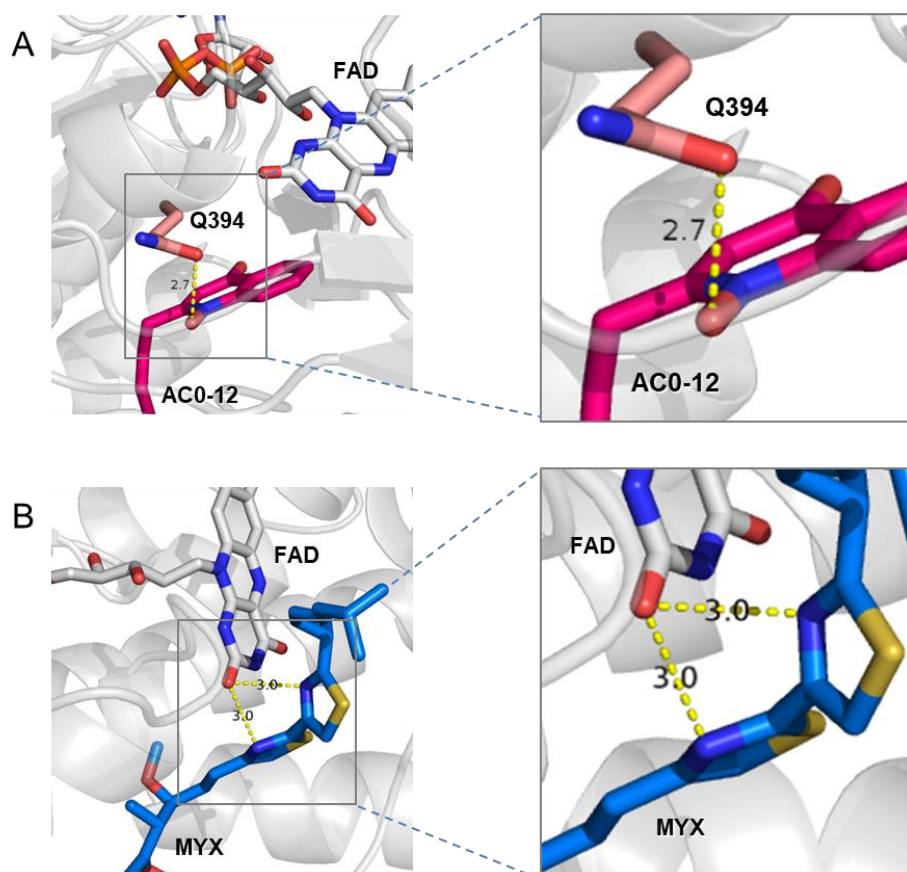

**Figure S1.** Amino acid residues contributing to the interaction with AC0-12 and myxothiazol molecules by hydrogen bonding. The protein backbone is represented by a gray cartoon, and the FAD and Gln394 (Q394) molecules are indicated with white and pale orange, respectively. (A) Interaction between Q394 and AC0-12 (red). (B) Interaction between the isoalloxazine ring of FAD and myxothiazol (blue).

**Table S1.** Data collection and refinement statistics

| Data set                                           | NDH2-stigmatellin     | NDH2-AC0-12         | NDH2-myxothiazol   |
|----------------------------------------------------|-----------------------|---------------------|--------------------|
| <b>Data collection</b>                             |                       |                     |                    |
| Space group                                        | $C222_1$              | $P2_12_12_1$        | $P2_12_12_1$       |
| Cell parameters<br>$a / b / c$ (Å)                 | 116.7, 128.5, 86.7    | 69.9, 115.8, 166.5  | 70.3, 116.4, 166.6 |
| X-ray source                                       | SPring8 BL44XU        | SPring8 BL44XU      | KEK-PF 17A         |
| Wavelength (Å)                                     | 0.9000                | 0.9000              | 0.9800             |
| Temperature (K)                                    | 100                   | 100                 | 100                |
| Resolution (Å)                                     | 50.0-1.85 (1.88-1.85) | 50.0-3.4 (3.46-3.4) | 50-3.2 (3.26-3.2)  |
| Total reflections                                  | 301,479               | 90,367              | 147,138            |
| Unique reflections                                 | 55,879                | 18,371              | 22,984             |
| Completeness (%)                                   | 99.9 (100.0)          | 97.3 (98.6)         | 98.1 (99.6)        |
| $R_{\text{merge}} I$                               | 0.086 (0.786)         | 0.094(0.764)        | 0.125 (0.609)      |
| $I/\sigma(I)$                                      | 7.1 (1.8)             | 7.9 (1.2)           | 7.1 (2.7)          |
| Redundancy                                         | 5.4 (5.0)             | 4.9 (4.6)           | 6.5 (5.8)          |
| <b>Refinement</b>                                  |                       |                     |                    |
| Resolution (Å)                                     | 30 – 1.85             | 30 – 3.4            | 20 – 3.2           |
| No. of reflections                                 | 49,008                | 15,012              | 19,430             |
| $R_{\text{work}} / R_{\text{free}}$                | 0.182 / 0.204         | 0.207 / 0.299       | 0.220 / 0.285      |
| Average $B$ -factors (Å <sup>2</sup> )             | 24.3                  | 62.9                | 78.4               |
| rmsd from ideal values                             |                       |                     |                    |
| Bond length (Å)                                    | 0.007                 | 0.011               | 0.008              |
| Bond angle (°)                                     | 1.44                  | 1.61                | 1.43               |
| Residues in the Ramachandran plot (%) <sup>*</sup> |                       |                     |                    |
| Most favored regions                               | 92.1                  | 79.5                | 82.3               |
| Additionally allowed regions                       | 7.9                   | 19.1                | 17.0               |
| Generously allowed regions                         | 0.0                   | 1.4                 | 0.6                |
| Disallowed regions                                 | 0.0                   | 0.0                 | 0.0                |
| Protein Data Bank ID code                          | 5YJW                  | 5YJY                | 5YJX               |

<sup>\*</sup> calculated by Procheck

**Table S2.** The primers used for the site-directed mutagenesis of Ndi1

| mutant | forward primer                                    | reverse primer                                   |
|--------|---------------------------------------------------|--------------------------------------------------|
| W63F   | 5'-TCGGGGT <b>T</b> CGGAGCTATTTTCGTTTTTAAAGCAC-3' | 5'-AGCTCCGAACCCCGAACCCAGTATCAGCACGTT-3'          |
| A393G  | 5'-CCAACCG <b>G</b> CCAAGTAGCGCACCAAGAG-3'        | 5'-TACTTGGCCGGTTGGTGGCAACCCAGC-3'                |
| Q394G  | 5'-ACCGCC <b>G</b> AGTAGCGCACCAAGAGGCC-3'         | 5'-CGCTACTCCGGCGGTTGGTGGCAACCC-3'                |
| Q394A  | 5'-ACCGCC <b>G</b> CAGTAGCGCACCAAGAGGCCGAATAT-3'  | 5'-CGCTACT <b>G</b> CGGCGGTTGGTGGCAACCCAGCAAA-3' |
| H397A  | 5'-GCCCAAGTAGCG <b>G</b> CCAAGAGGCCG-3'           | 5'-CGGCCTCTTGG <b>G</b> CCGCTACTTGGGC-3'         |
| L444D  | 5'-AACGAT <b>G</b> ATGGTGCCTTAGCATACCTGGGATCC-3'  | 5'-GGCACCA <b>T</b> CATCGTTGTATTTGAAAGGTTTAAA-3' |
| L444N  | 5'-AACGATA <b>A</b> TGGTGCCTTAGCATACCTGGGATCC-3'  | 5'-GGCACCA <b>T</b> TATCGTTGTATTTGAAAGGTTTAAA-3' |
| L447N  | 5'-GGTGCCA <b>A</b> TGCATACCTGGGATCCGAAAGGGCC-3'  | 5'-GTATGC <b>A</b> TTGGCACCTAAATCGTTGTATTTGAA-3' |
| I459A  | 5'-GCAACCG <b>C</b> ACGTTCCGGTAAGAGAACATTTTAC-3'  | 5'-GGAACGT <b>G</b> CGGTTGCAATGGCCCTTTCGGATCC-3' |
| I459N  | 5'-GCAACCA <b>A</b> TCGTTCCGGTAAGAGAACATTTTAC-3'  | 5'-GGAACG <b>A</b> TTGGTTGCAATGGCCCTTTCGGATCC-3' |
| I459W  | 5'-GCAACCT <b>G</b> GCGTTCGGTAAGAGAACAA-3'        | 5'-GGAACG <b>C</b> CAGGTTGCAATGGCCCTTTC-3'       |
| R479I  | 5'-CTTATTCATAATTTTGTACTTGTCCATGATTCT-3'           | 5'-GTACAAAATTATCCATAAGTAGAAGGTCATTAAGC-3'        |
| R479A  | 5'-TTATGGG <b>C</b> AATTTTGTACTTGTCCATG-3'        | 5'-CAAAATT <b>G</b> CCCATAAGTAGAAGGTCAT-3'       |
| R479K  | 5'-TTATGGA <b>A</b> GATTTTGTACTTGTCCATG-3'        | 5'-CAAAAT <b>C</b> TCCATAAGTAGAAGGTCAT-3'        |
| R479H  | 5'-TTATGG <b>C</b> ACATTTTGTACTTGTCCATG-3'        | 5'-CAAAAT <b>G</b> TGCCATAAGTAGAAGGTCAT-3'       |
| Y482F  | 5'-ATTTTGT <b>T</b> CTTGTCCATGATTCTATCT-3'        | 5'-GGACAAGA <b>A</b> CAAAATTCTCCATAAGTA-3'       |
| S484F  | 5'-TACTTGT <b>T</b> CATGATTCTATCTGCAAGA-3'        | 5'-AATCATGA <b>A</b> CAAGTACAAAATTCTCCA-3'       |
| S484I  | 5'-TACTTGAT <b>T</b> CATGATTCTATCTGCAAGA-3'       | 5'-AATCATG <b>A</b> TCAAGTACAAAATTCTCCA-3'       |
| M485A  | 5'-TTGTCC <b>G</b> CGATTCTATCTGCAAGATCG-3'        | 5'-TAGAAT <b>C</b> GCGGACAAGTACAAAATTCT-3'       |
| M485E  | 5'-TTGTCC <b>G</b> AGATTCTATCTGCAAGATCG-3'        | 5'-TAGAAT <b>C</b> TGCGACAAGTACAAAATTCTCC-3'     |
| L487A  | 5'-ATGATT <b>G</b> CATCTGCAAGATCGAGATTA-3'        | 5'-TGCAGAT <b>G</b> CAATCATGGACAAGTACAA-3'       |

Bold typefaces indicate the introduced mutation sites.
